# Supplementary material for: Systemic Copper Disorders Influence the Olfactory Function in Adult Rats: Roles of Altered Adult Neurogenesis and Neurochemical Imbalance
Source: MDPI journal article supplement (doi:10.3390/biom11091315), 2021-09-06
Supplement: s1 [file s1]

## Systemic Copper Disorders Influence the Olfactory Function in Adult Rats: Roles of Altered Adult Neurogenesis and Neurochemical Imbalance

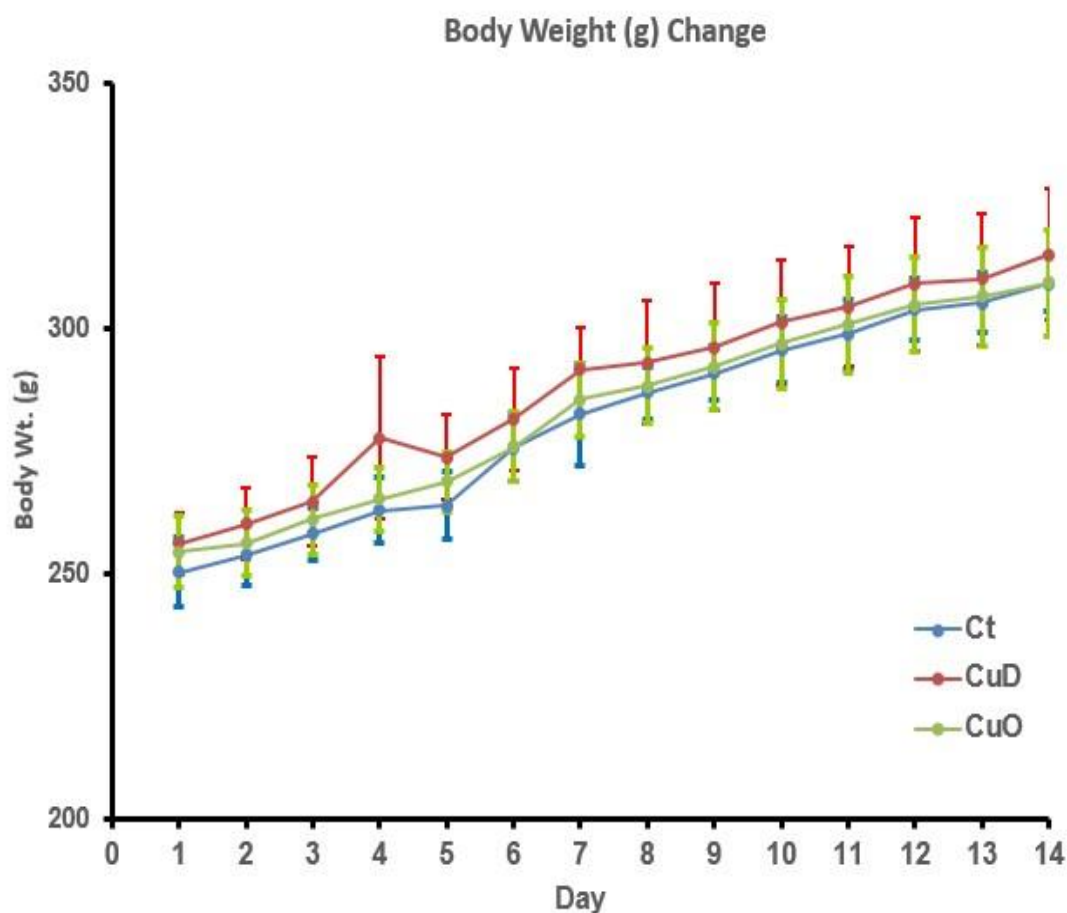

**Figure S1.** Record of rat body weights during the course of Cu treatment. Ct: control; CuD: Cu deficiency; CuO: Cu overload. Data represent mean  $\pm$  SD,  $n = 14$ /group.
